# Supplementary material for: Sylvatic Canine Morbillivirus in Captive Panthera Highlights Viral Promiscuity and the Need for Better Prevention Strategies
Source: MDPI journal article supplement (doi:10.3390/pathogens10050544), 2021-04-30
Supplement: s1 [file s1]

**Table 1. Detailed signalment of felids with confirmed vaccination previous to the outbreak in 2015–2016. Per confirming records, all felids have been vaccinated with Nobivac Puppy-DPv (modified live vaccine that covers canine distemper and parvoviruses). n.a. = not applicable.**

| Species        | Sex | Arrival to the Center (year) | Vaccination Date | Vaccinated Date(s) during the Outbreak |
|----------------|-----|------------------------------|------------------|----------------------------------------|
| lion           | f   | 2012                         | 24/03/2013       | 31/10/2015 and 3/12/2015               |
| tiger          | m   | 1998                         | 12/06/2000       | 3/12/2015                              |
| tiger          | m   | 2011                         | 28/09/2012       | 31/10/2015 and 3/12/2015               |
| tiger (case#4) | f   | 2010                         | 25/03/2013       | n.a.                                   |
| tiger          | m   | 2010                         | 23/03/2013       | 31/10/2015 and 3/12/2015               |
| lion           | f   | 2012                         | 24/03/2013       | 1/11/2015                              |
| lion           | f   | 2005                         | 23/04/2009       | 1/11/2015                              |
| leopard        | m   | 2006                         | 26/03/2009       | 1/11/2015                              |
| tiger          | f   | 2004                         | 3/12/2014        | 1/11/2015                              |
| leopard        | m   | 2006                         | 3/12/2014        | 1/11/2015                              |
| tiger          | f   | 2013                         | 9/04/2013        | 1/11/2015 and 20/11/2015               |
| tiger          | f   | 2000                         | 05/09/2009       | 1/11/2015                              |
| tiger          | m   | 2006                         | 31/3/2006        | 1/11/2015                              |
| tiger          | m   | 2006                         | 31/3/2006        | 1/11/2015                              |
| tiger          | m   | 2006                         | 31/3/2006        | 1/11/2015 and 5/12/2015                |
| tiger          | f   | 2009                         | 19/07/2009       | 1/11/2015 and 5/12/2015                |
| tiger          | f   | 2009                         | 19/07/2009       | 1/11/2015 and 5/12/2015                |
| tiger          | m   | 2010                         | 27/09/2010       | 1/11/2015                              |
| tiger          | f   | 2010                         | 27/09/2010       | 5/12/2015                              |
| leopard        | m   | 2010                         | 27/09/2010       | 1/11/2015 and 5/12/2015                |
| tiger          | m   | 2009                         | 13/03/2013       | 1/11/2015 and 5/12/2015                |
| lion           | m   | 2010                         | 27/09/2010       | 1/11/2015                              |
| tiger          | m   | 2011                         | 28/09/2012       | 1/11/2015                              |
| tiger          | f   | 2009                         | 19/07/2009       | 1/11/2015                              |
| tiger          | m   | 2006                         | 22/08/2006       | 1/11/2015                              |
| tiger          | m   | 2006                         | 22/08/2006       | 1/11/2015                              |
| tiger          | m   | 2006                         | 22/08/2006       | 1/11/2015                              |
| lion           | f   | 2012                         | 24/03/2013       | 1/11/2015                              |
| lion           | m   | 2012                         | 18/10/2012       | 1/11/2015                              |
| bobcat         | m   | 2010                         | 3/12/2014        | n.a.                                   |
| asian leopard  | m   | 2007                         | 16/03/2009       | n.a.                                   |
| lion           | m   | 2000                         | 23/05/2013       | 1/11/2015                              |
| lion           | f   | 2000                         | 28/08/2000       | 1/11/2015                              |

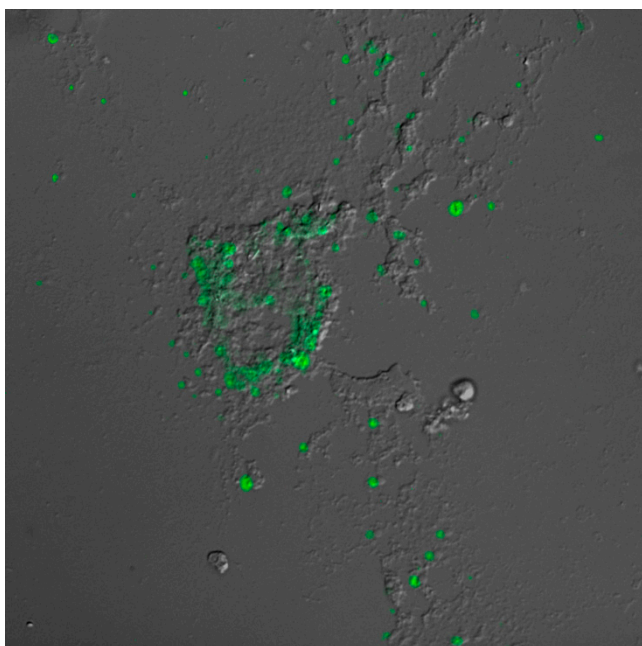

**Figure S1.** Direct immunofluorescence assay from lung from tiger #3. Bright green signal correspond to canine distemper epitopes.

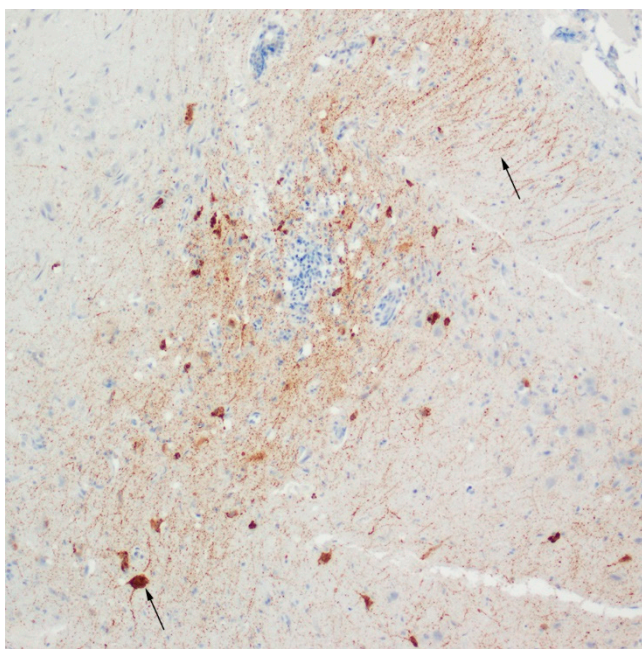

**Figure S2.** Immunohistochemistry for CDV from brain from a raccoon from IN harvested in May of 2016 approximately 2.5km from the rescue centre: There is strong immunoreactivity to CDV-epitopes that accumulate within axons and perikarya; in some areas the nucleus is obscured (arrows). Unfortunately no CDV-genetic material was available for comparison of the H-gene sequences.
